# Supplementary material
Source: HighWire-hosted journal article supplement (https://www.ajnr.org/highwire/filestream/90067/field_highwire_adjunct_files/0/0925.pdf)

**Supplementary table 1. Perfusion and VAI parameters in ETP and PP diagnosed within 9 months of completing CCRT**

| Imaging parameters         | ETP (n=28)     | PP (n=14)     | <i>P</i> value |
|----------------------------|----------------|---------------|----------------|
| rCBV                       | 1.99 ± 0.82    | 1.30 ± 0.54   | .003           |
| Relative vessel size index | 105.61 ± 37.23 | 78.31 ± 40.13 | .05            |
| Peak shift                 | -0.001 ± 0.37  | 0.42 ± 0.80   | .09            |
| Arterial dominancy score   | 1.43 ± 0.68    | 2.07 ± 0.46   | .001           |

Note: *P* value from independent sample t test.

Abbreviations: VAI = Vessel architectural imaging, ETP = Early tumor progression, PP = Pseudoprogression, rCBV = relative cerebral blood volume.

**Supplementary table 2. Diagnostic performance of individual and combined imaging parameters from perfusion and VAI in differentiating PP from ETP diagnosed within 9 months of completing CCRT**

| <b>Individual parameters</b>      | <b>AUC</b> | <b>Criterion</b> | <b>95% CI</b> | <b>Sensitivity</b> | <b>Specificity</b> | <b>Accuracy</b> |
|-----------------------------------|------------|------------------|---------------|--------------------|--------------------|-----------------|
| rCBV                              | 0.73       | $\leq 1.74$      | 0.57–0.86     | 53.6               | 92.9               | 66.7            |
| Relative vessel size index        | 0.68       | $\leq 86.7$      | 0.50–0.87     | 64.3               | 71.4               | 66.7            |
| Peak shift                        | 0.60       | $> 0.345$        | 0.41–0.80     | 92.8               | 35.7               | 73.8            |
| Arterial dominance score          | 0.78       | $> 1$            | 0.64–0.91     | 67.8               | 92.8               | 76.2            |
| <b>Individual parameters</b>      | <b>AUC</b> | <b>Criterion</b> | <b>95% CI</b> | <b>Sensitivity</b> | <b>Specificity</b> | <b>Accuracy</b> |
| rCBV + Relative vessel size index | 0.73       | NA               | 0.57–0.88     | 50.0               | 92.8               | 64.3            |
| rCBV+ Peak shift                  | 0.78       | NA               | 0.63–0.93     | 96.4               | 50.0               | 80.9            |
| rCBV + Arterial dominance score   | 0.86       | NA               | 0.75–0.98     | 82.1               | 85.7               | 83.3            |

Abbreviations: VAI = Vessel architectural imaging, PP = Pseudoprogression, ETP = Early tumor progression, AUC = area under the receiver operating characteristics curve, CI = confidence interval, rCBV = relative cerebral blood volume.

**Supplementary figure 1.** (A) Early tumor progression. The time curves (right) shows TE#2 (spin-echo) peak preceding TE#1 (gradient-echo) peak. The fitted curves are plotted with  $\Delta R2^{3/2}$  along the x-axis and  $\Delta R2^*$  along the y-axis resulting in the counter-clockwise rotation corresponding to venous dominance. (B) Pseudoprogession. The time curves (right) shows TE#1 (gradient-echo) peak preceding TE#2 (spin-echo) peak. The fitted curves are plotted with  $\Delta R2^{3/2}$  along the x-axis and  $\Delta R2^*$  along the y-axis resulting in the clockwise rotation corresponding to arterial dominance.

(A)

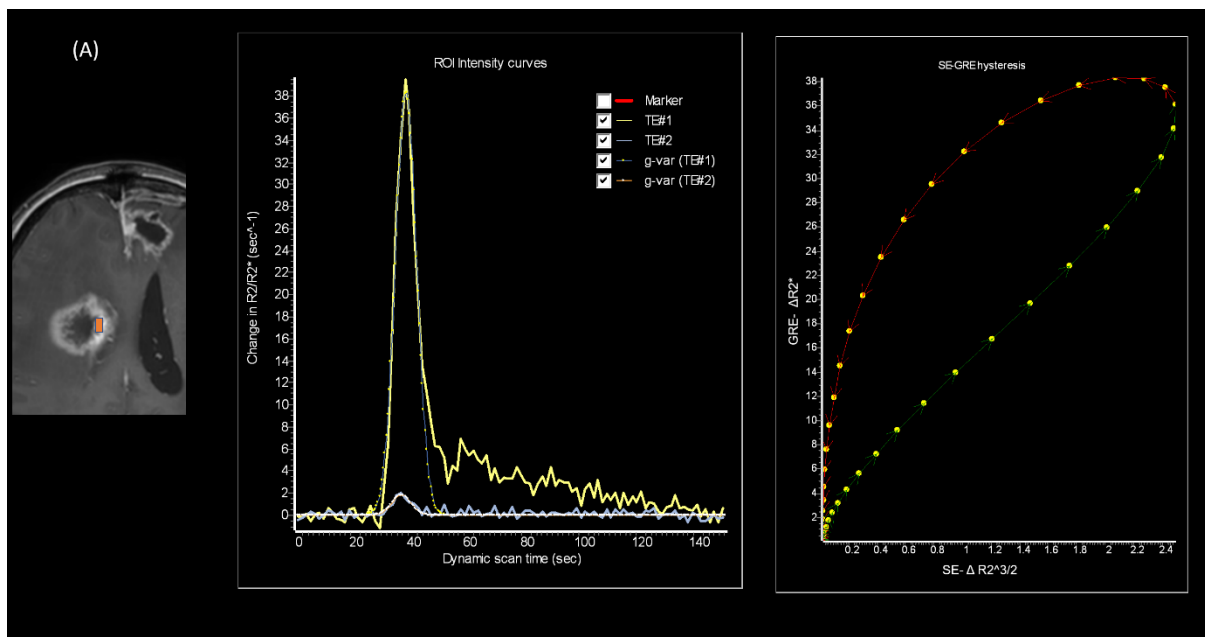

(B)

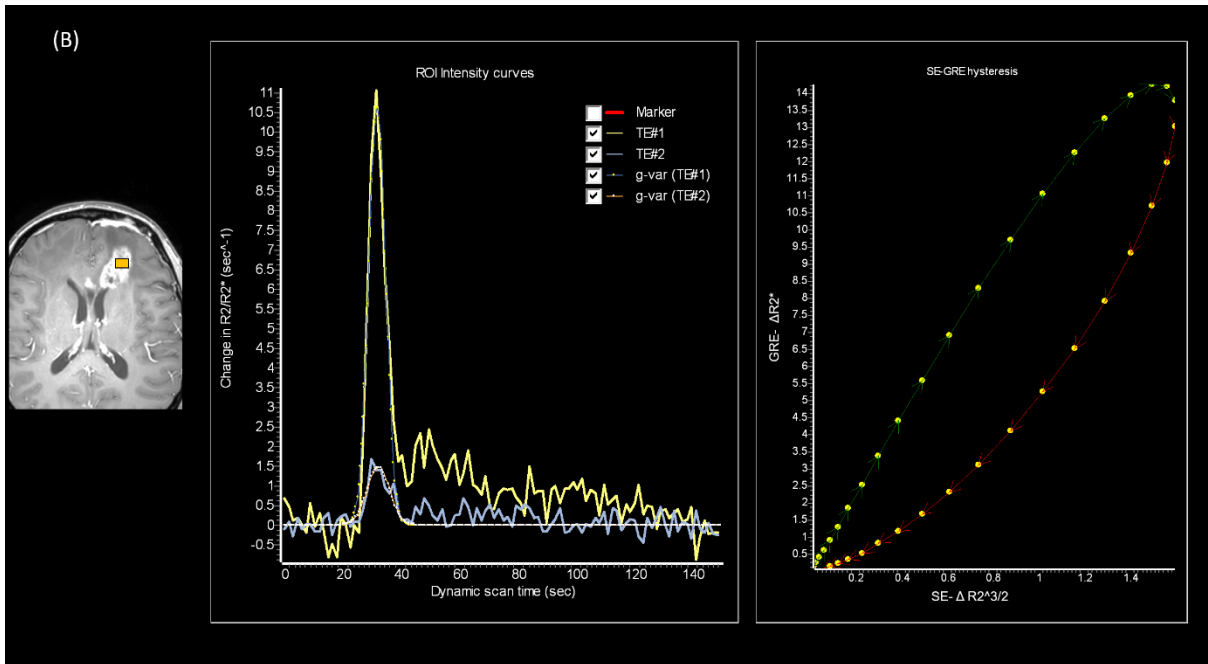

Supplement: 0925.pdf [file 0925.pdf]
